# Supplementary material for: Im stehenden Licht: 2668
Source: MDPI journal article supplement (doi:10.3390/molecules27092885), 1996-01-01
Supplement: s1 [file s1]

# Supporting Information

## **Insight into spodium- $\pi$ bonding characteristics of the $\text{MX}_2\cdots\pi$ (M = Zn, Cd and Hg; X = Cl, Br and I) complexes–**

### **A theoretical study**

Meng Gao <sup>1,\*</sup>, Qibo Zhao <sup>1</sup>, Hao Yu <sup>1</sup>, Min Fu <sup>1</sup>, and Qingzhong Li <sup>2,\*</sup>

<sup>1</sup> College of Chemical and Biological Engineering, Shandong University of Science and Technology, Qingdao 266590, China;

<sup>2</sup> The Laboratory of Theoretical and Computational Chemistry, School of Chemistry and Chemical Engineering, Yantai University, Yantai 264005, China

\* Corresponding Authors: Meng Gao, E-mail: skd996370@sdust.edu.cn; Qingzhong Li, E-mail: li70316@sohu.com.

**Table S1.** Distances ( $R$ , Å) between M in  $\text{MX}_2$  and the centers of C–C bond in  $\pi$  molecules (\* denote the centers of C–C bond), angles of X–M–X in  $\text{MX}_2$  ( $\alpha$ , deg), dihedral angle of X–X $\cdots$ C–C ( $\theta$ , deg), and interaction energy ( $\Delta E$ , kcal/mol) in the complexes at the MP2/aug-cc-pVTZ level.

|                                                             | $R_{M\cdots*}$ | $R_{M-X}$ | $R_{C-C}$ | $\alpha$ | $\theta$ | $\Delta E$ |
|-------------------------------------------------------------|----------------|-----------|-----------|----------|----------|------------|
| ZnCl <sub>2</sub> $\cdots$ C <sub>2</sub> H <sub>2</sub> –P | 2.406          | 2.094     | 1.218     | 151      | 0        | –11.60     |
| ZnBr <sub>2</sub> $\cdots$ C <sub>2</sub> H <sub>2</sub> –P | 2.387          | 2.222     | 1.219     | 149      | 0        | –9.72      |
| ZnI <sub>2</sub> $\cdots$ C <sub>2</sub> H <sub>2</sub> –P  | 2.387          | 2.411     | 1.220     | 146      | 0        | –8.30      |
| CdCl <sub>2</sub> $\cdots$ C <sub>2</sub> H <sub>2</sub> –P | 2.664          | 2.280     | 1.218     | 163      | 0        | –9.66      |
| CdBr <sub>2</sub> $\cdots$ C <sub>2</sub> H <sub>2</sub> –P | 2.670          | 2.401     | 1.218     | 161      | 0        | –8.26      |
| CdI <sub>2</sub> $\cdots$ C <sub>2</sub> H <sub>2</sub> –P  | 2.700          | 2.580     | 1.218     | 159      | 0        | –6.82      |
| HgCl <sub>2</sub> $\cdots$ C <sub>2</sub> H <sub>2</sub> –P | 3.056          | 2.238     | 1.215     | 176      | 0        | –3.92      |
| HgBr <sub>2</sub> $\cdots$ C <sub>2</sub> H <sub>2</sub> –P | 3.078          | 2.363     | 1.215     | 175      | 0        | –2.96      |
| HgI <sub>2</sub> $\cdots$ C <sub>2</sub> H <sub>2</sub> –P  | 3.145          | 2.541     | 1.215     | 175      | 0        | –2.11      |
| ZnCl <sub>2</sub> $\cdots$ C <sub>2</sub> H <sub>2</sub> –T | 2.545          | 2.077     | 1.216     | 159      | 83       | –6.26      |
| ZnBr <sub>2</sub> $\cdots$ C <sub>2</sub> H <sub>2</sub> –T | 2.538          | 2.204     | 1.216     | 158      | 83       | –5.29      |
| ZnI <sub>2</sub> $\cdots$ C <sub>2</sub> H <sub>2</sub> –T  | 2.575          | 2.391     | 1.216     | 157      | 83       | –4.76      |
| CdCl <sub>2</sub> $\cdots$ C <sub>2</sub> H <sub>2</sub> –T | 2.757          | 2.268     | 1.216     | 166      | 83       | –6.11      |
| CdBr <sub>2</sub> $\cdots$ C <sub>2</sub> H <sub>2</sub> –T | 2.770          | 2.389     | 1.216     | 165      | 83       | –5.24      |
| CdI <sub>2</sub> $\cdots$ C <sub>2</sub> H <sub>2</sub> –T  | 2.806          | 2.566     | 1.216     | 165      | 83       | –4.31      |
| HgCl <sub>2</sub> $\cdots$ C <sub>2</sub> H <sub>2</sub> –T | 3.083          | 2.234     | 1.214     | 177      | 84       | –2.30      |
| HgBr <sub>2</sub> $\cdots$ C <sub>2</sub> H <sub>2</sub> –T | 3.081          | 2.359     | 1.214     | 176      | 84       | –1.78      |
| HgI <sub>2</sub> $\cdots$ C <sub>2</sub> H <sub>2</sub> –T  | 3.127          | 2.541     | 1.214     | 176      | 83       | –1.37      |
| ZnCl <sub>2</sub> $\cdots$ C <sub>2</sub> H <sub>4</sub> –P | 2.391          | 2.090     | 1.346     | 148      | 0        | –11.68     |
| ZnBr <sub>2</sub> $\cdots$ C <sub>2</sub> H <sub>4</sub> –P | 2.367          | 2.225     | 1.347     | 146      | 0        | –10.89     |
| ZnI <sub>2</sub> $\cdots$ C <sub>2</sub> H <sub>4</sub> –P  | 2.361          | 2.414     | 1.348     | 143      | 0        | –9.78      |
| CdCl <sub>2</sub> $\cdots$ C <sub>2</sub> H <sub>4</sub> –P | /              | /         | /         | /        | /        | /          |
| CdBr <sub>2</sub> $\cdots$ C <sub>2</sub> H <sub>4</sub> –P | 2.635          | 2.406     | 1.344     | 157      | 0        | –8.58      |
| CdI <sub>2</sub> $\cdots$ C <sub>2</sub> H <sub>4</sub> –P  | 2.649          | 2.584     | 1.345     | 155      | 0        | –7.26      |
| HgCl <sub>2</sub> $\cdots$ C <sub>2</sub> H <sub>4</sub> –P | /              | /         | /         | /        | /        | /          |
| HgBr <sub>2</sub> $\cdots$ C <sub>2</sub> H <sub>4</sub> –P | 3.051          | 2.364     | 1.338     | 174      | 0        | –2.12      |
| HgI <sub>2</sub> $\cdots$ C <sub>2</sub> H <sub>4</sub> –P  | 3.090          | 2.542     | 1.338     | 173      | 0        | –1.40      |
| ZnCl <sub>2</sub> $\cdots$ C <sub>2</sub> H <sub>4</sub> –T | 2.410          | 2.089     | 1.346     | 155      | 82       | –11.09     |
| ZnBr <sub>2</sub> $\cdots$ C <sub>2</sub> H <sub>4</sub> –T | 2.400          | 2.216     | 1.346     | 153      | 82       | –9.51      |

|                                                        |       |       |       |     |    |         |
|--------------------------------------------------------|-------|-------|-------|-----|----|---------|
| ZnI <sub>2</sub> ···C <sub>2</sub> H <sub>4</sub> -T   | 2.409 | 2.405 | 1.346 | 152 | 82 | -7.87   |
| CdCl <sub>2</sub> ···C <sub>2</sub> H <sub>4</sub> -T  | 2.637 | 2.279 | 1.344 | 163 | 82 | -9.52   |
| CdBr <sub>2</sub> ···C <sub>2</sub> H <sub>4</sub> -T  | 2.640 | 2.401 | 1.344 | 163 | 82 | -8.17   |
| CdI <sub>2</sub> ···C <sub>2</sub> H <sub>4</sub> -T   | 2.664 | 2.578 | 1.344 | 162 | 82 | -6.80   |
| HgCl <sub>2</sub> ···C <sub>2</sub> H <sub>4</sub> -T  | 2.934 | 2.241 | 1.339 | 175 | 82 | -3.32   |
| HgBr <sub>2</sub> ···C <sub>2</sub> H <sub>4</sub> -T  | 2.924 | 2.365 | 1.339 | 175 | 82 | -2.30   |
| HgI <sub>2</sub> ···C <sub>2</sub> H <sub>4</sub> -T   | 2.949 | 2.543 | 1.339 | 174 | 82 | -1.60   |
| ZnCl <sub>2</sub> ···C <sub>2</sub> F <sub>2</sub> -P  | 2.869 | 2.058 | 1.199 | 171 | 33 | -2.36   |
| ZnBr <sub>2</sub> ···C <sub>2</sub> F <sub>2</sub> -P  | 2.886 | 2.184 | 1.199 | 171 | 42 | -1.26   |
| ZnI <sub>2</sub> ···C <sub>2</sub> F <sub>2</sub> -P   | 2.958 | 2.372 | 1.198 | 172 | 50 | -1.36   |
| CdCl <sub>2</sub> ···C <sub>2</sub> F <sub>2</sub> -P  | 2.957 | 2.255 | 1.200 | 173 | 33 | -3.25   |
| CdBr <sub>2</sub> ···C <sub>2</sub> F <sub>2</sub> -P  | 2.976 | 2.376 | 1.199 | 174 | 40 | -2.39   |
| CdI <sub>2</sub> ···C <sub>2</sub> F <sub>2</sub> -P   | 3.026 | 2.554 | 1.199 | 174 | 47 | -1.77   |
| HgCl <sub>2</sub> ···C <sub>2</sub> F <sub>2</sub> -P  | 3.162 | 2.230 | 1.197 | 179 | 39 | -1.64   |
| HgBr <sub>2</sub> ···C <sub>2</sub> F <sub>2</sub> -P  | 3.152 | 2.355 | 1.197 | 179 | 46 | -1.03   |
| HgI <sub>2</sub> ···C <sub>2</sub> F <sub>2</sub> -P   | 3.177 | 2.533 | 1.197 | 179 | 52 | -0.79   |
| ZnCl <sub>2</sub> ···C <sub>2</sub> Li <sub>2</sub> -P | 1.965 | 2.222 | 1.277 | 120 | 0  | -106.75 |
| ZnBr <sub>2</sub> ···C <sub>2</sub> Li <sub>2</sub> -P | 1.968 | 2.348 | 1.276 | 119 | 0  | -99.94  |
| ZnI <sub>2</sub> ···C <sub>2</sub> Li <sub>2</sub> -P  | 1.976 | 2.535 | 1.276 | 117 | 1  | -93.57  |
| CdCl <sub>2</sub> ···C <sub>2</sub> Li <sub>2</sub> -P | 2.166 | 2.421 | 1.279 | 134 | 0  | -97.43  |
| CdBr <sub>2</sub> ···C <sub>2</sub> Li <sub>2</sub> -P | 2.172 | 2.534 | 1.279 | 132 | 0  | -89.97  |
| CdI <sub>2</sub> ···C <sub>2</sub> Li <sub>2</sub> -P  | 2.180 | 2.709 | 1.278 | 128 | 0  | -83.63  |
| HgCl <sub>2</sub> ···C <sub>2</sub> Li <sub>2</sub> -P | 2.141 | 2.439 | 1.291 | 129 | 0  | -96.58  |
| HgBr <sub>2</sub> ···C <sub>2</sub> Li <sub>2</sub> -P | 2.152 | 2.543 | 1.289 | 126 | 0  | -87.51  |
| HgI <sub>2</sub> ···C <sub>2</sub> Li <sub>2</sub> -P  | 2.167 | 2.699 | 1.287 | 123 | 0  | -78.82  |

---

**Table S2.** Charge transfer (CT, e), Second-order perturbation energies ( $E^{(2)}$ , kcal/mol) and Wiberg bond index (WBI) in the complexes at the HF/aug-cc-pVTZ level.

|                                                       | CT     | $E^{(2)}$ | WBI    |
|-------------------------------------------------------|--------|-----------|--------|
| ZnCl <sub>2</sub> ...C <sub>2</sub> H <sub>2</sub> -P | -0.067 | 35.25     | 0.1018 |
| ZnBr <sub>2</sub> ...C <sub>2</sub> H <sub>2</sub> -P | -0.073 | 46.63     | 0.1108 |
| ZnI <sub>2</sub> ...C <sub>2</sub> H <sub>2</sub> -P  | -0.074 | 39.06     | 0.1149 |
| CdCl <sub>2</sub> ...C <sub>2</sub> H <sub>2</sub> -P | -0.061 | 24.99     | 0.0690 |
| CdBr <sub>2</sub> ...C <sub>2</sub> H <sub>2</sub> -P | -0.067 | 27.38     | 0.0738 |
| CdI <sub>2</sub> ...C <sub>2</sub> H <sub>2</sub> -P  | -0.068 | 27.80     | 0.0752 |
| HgCl <sub>2</sub> ...C <sub>2</sub> H <sub>2</sub> -P | -0.022 | 7.58      | 0.0280 |
| HgBr <sub>2</sub> ...C <sub>2</sub> H <sub>2</sub> -P | -0.024 | 8.63      | 0.0309 |
| HgI <sub>2</sub> ...C <sub>2</sub> H <sub>2</sub> -P  | -0.023 | 8.19      | 0.0317 |
| ZnCl <sub>2</sub> ...C <sub>2</sub> H <sub>2</sub> -T | -0.063 | 30.70     | 0.0823 |
| ZnBr <sub>2</sub> ...C <sub>2</sub> H <sub>2</sub> -T | -0.071 | 34.32     | 0.0760 |
| ZnI <sub>2</sub> ...C <sub>2</sub> H <sub>2</sub> -T  | -0.074 | 31.94     | 0.0701 |
| CdCl <sub>2</sub> ...C <sub>2</sub> H <sub>2</sub> -T | -0.060 | 20.95     | 0.0571 |
| CdBr <sub>2</sub> ...C <sub>2</sub> H <sub>2</sub> -T | -0.067 | 22.56     | 0.0612 |
| CdI <sub>2</sub> ...C <sub>2</sub> H <sub>2</sub> -T  | -0.069 | 22.14     | 0.0615 |
| HgCl <sub>2</sub> ...C <sub>2</sub> H <sub>2</sub> -T | -0.025 | 7.62      | 0.0271 |
| HgBr <sub>2</sub> ...C <sub>2</sub> H <sub>2</sub> -T | -0.030 | 8.78      | 0.0309 |
| HgI <sub>2</sub> ...C <sub>2</sub> H <sub>2</sub> -T  | -0.033 | 9.50      | 0.0331 |
| ZnCl <sub>2</sub> ...C <sub>2</sub> H <sub>4</sub> -P | -0.078 | 27.50     | 0.0920 |
| ZnBr <sub>2</sub> ...C <sub>2</sub> H <sub>4</sub> -P | -0.082 | 44.90     | 0.0996 |
| ZnI <sub>2</sub> ...C <sub>2</sub> H <sub>4</sub> -P  | -0.083 | 57.23     | 0.1044 |
| CdCl <sub>2</sub> ...C <sub>2</sub> H <sub>4</sub> -P | /      | /         | /      |
| CdBr <sub>2</sub> ...C <sub>2</sub> H <sub>4</sub> -P | -0.098 | 31.43     | 0.0981 |
| CdI <sub>2</sub> ...C <sub>2</sub> H <sub>4</sub> -P  | -0.099 | 33.48     | 0.0999 |
| HgCl <sub>2</sub> ...C <sub>2</sub> H <sub>4</sub> -P | /      | /         | /      |
| HgBr <sub>2</sub> ...C <sub>2</sub> H <sub>4</sub> -P | -0.039 | 12.95     | 0.0438 |
| HgI <sub>2</sub> ...C <sub>2</sub> H <sub>4</sub> -P  | -0.040 | 13.40     | 0.0450 |
| ZnCl <sub>2</sub> ...C <sub>2</sub> H <sub>4</sub> -T | -0.085 | 44.95     | 0.0851 |
| ZnBr <sub>2</sub> ...C <sub>2</sub> H <sub>4</sub> -T | -0.093 | 48.67     | 0.0907 |
| ZnI <sub>2</sub> ...C <sub>2</sub> H <sub>4</sub> -T  | -0.100 | 58.39     | 0.0934 |
| CdCl <sub>2</sub> ...C <sub>2</sub> H <sub>4</sub> -T | -0.095 | 27.99     | 0.0883 |
| CdBr <sub>2</sub> ...C <sub>2</sub> H <sub>4</sub> -T | -0.102 | 30.13     | 0.0922 |

|                                                        |        |                          |        |
|--------------------------------------------------------|--------|--------------------------|--------|
| CdI <sub>2</sub> ...C <sub>2</sub> H <sub>4</sub> -T   | -0.106 | 31.59                    | 0.0923 |
| HgCl <sub>2</sub> ...C <sub>2</sub> H <sub>4</sub> -T  | -0.048 | 14.69                    | 0.0484 |
| HgBr <sub>2</sub> ...C <sub>2</sub> H <sub>4</sub> -T  | -0.055 | 17.06                    | 0.0539 |
| HgI <sub>2</sub> ...C <sub>2</sub> H <sub>4</sub> -T   | -0.059 | 17.98                    | 0.0556 |
| ZnCl <sub>2</sub> ...C <sub>2</sub> F <sub>2</sub> -P  | -0.039 | 15.43                    | 0.0412 |
| ZnBr <sub>2</sub> ...C <sub>2</sub> F <sub>2</sub> -P  | -0.042 | 17.84                    | 0.0433 |
| ZnI <sub>2</sub> ...C <sub>2</sub> F <sub>2</sub> -P   | -0.041 | 18.9                     | 0.0407 |
| CdCl <sub>2</sub> ...C <sub>2</sub> F <sub>2</sub> -P  | -0.040 | 13.89                    | 0.0414 |
| CdBr <sub>2</sub> ...C <sub>2</sub> F <sub>2</sub> -P  | -0.043 | 15.31                    | 0.0430 |
| CdI <sub>2</sub> ...C <sub>2</sub> F <sub>2</sub> -P   | -0.042 | 15.88                    | 0.0436 |
| HgCl <sub>2</sub> ...C <sub>2</sub> F <sub>2</sub> -P  | -0.020 | 7.07                     | 0.0231 |
| HgBr <sub>2</sub> ...C <sub>2</sub> F <sub>2</sub> -P  | -0.024 | 8.93                     | 0.0267 |
| HgI <sub>2</sub> ...C <sub>2</sub> F <sub>2</sub> -P   | -0.026 | 10.53                    | 0.0290 |
| ZnCl <sub>2</sub> ...C <sub>2</sub> Li <sub>2</sub> -P | -0.907 | 128.48                   | 0.2540 |
| ZnBr <sub>2</sub> ...C <sub>2</sub> Li <sub>2</sub> -P | -1.043 | 61.84                    | 0.2619 |
| ZnI <sub>2</sub> ...C <sub>2</sub> Li <sub>2</sub> -P  | -0.870 | 24.99                    | 0.2758 |
| CdCl <sub>2</sub> ...C <sub>2</sub> Li <sub>2</sub> -P | -1.090 | 113.82                   | 0.2967 |
| CdBr <sub>2</sub> ...C <sub>2</sub> Li <sub>2</sub> -P | -1.094 | 110.02                   | 0.3052 |
| CdI <sub>2</sub> ...C <sub>2</sub> Li <sub>2</sub> -P  | -1.055 | 107.76                   | 0.3098 |
| HgCl <sub>2</sub> ...C <sub>2</sub> Li <sub>2</sub> -P | -1.293 | 48.5(91.98) <sup>a</sup> | 0.3873 |
| HgBr <sub>2</sub> ...C <sub>2</sub> Li <sub>2</sub> -P | -1.157 | 183.55                   | 0.3881 |
| HgI <sub>2</sub> ...C <sub>2</sub> Li <sub>2</sub> -P  | -1.040 | 171.21                   | 0.3876 |

Note: The charge transfer is the sum of atomic charge of the MX<sub>2</sub> in the complexes.  $E^{(2)}$  is the stabilization energy due to the orbital interactions of  $BD_{C=C/C\equiv C} \rightarrow LP^*_M$ . <sup>a</sup> the value in the parentheses is the stabilization energy due to the orbital interactions of  $BD_{C-Li} \rightarrow LP^*_M$ . WBI values correspond to the M...C in the complexes.

**Table S3.** Electron density ( $\rho$ , au), Laplacian ( $\nabla^2\rho$ , au), and total energy density ( $H$ , au) at the intermolecular bond critical points (BCPs) in the complexes at the MP2/aug-cc-pVTZ level.

|                                                       | $\rho$ | $\nabla^2\rho$ | $H$     |
|-------------------------------------------------------|--------|----------------|---------|
| ZnCl <sub>2</sub> ...C <sub>2</sub> H <sub>2</sub> -P | 0.0384 | 0.0988         | -0.0070 |
| ZnBr <sub>2</sub> ...C <sub>2</sub> H <sub>2</sub> -P | 0.0398 | 0.1023         | -0.0076 |
| ZnI <sub>2</sub> ...C <sub>2</sub> H <sub>2</sub> -P  | 0.0400 | 0.1018         | -0.0077 |
| CdCl <sub>2</sub> ...C <sub>2</sub> H <sub>2</sub> -P | 0.0295 | 0.0875         | -0.0018 |
| CdBr <sub>2</sub> ...C <sub>2</sub> H <sub>2</sub> -P | 0.0292 | 0.0863         | -0.0018 |
| CdI <sub>2</sub> ...C <sub>2</sub> H <sub>2</sub> -P  | 0.0276 | 0.0812         | -0.0014 |
| HgCl <sub>2</sub> ...C <sub>2</sub> H <sub>2</sub> -P | 0.0166 | 0.0499         | 0.0008  |
| HgBr <sub>2</sub> ...C <sub>2</sub> H <sub>2</sub> -P | 0.0160 | 0.0480         | 0.0009  |
| HgI <sub>2</sub> ...C <sub>2</sub> H <sub>2</sub> -P  | 0.0141 | 0.0427         | 0.0010  |
| ZnCl <sub>2</sub> ...C <sub>2</sub> H <sub>2</sub> -T | 0.0292 | 0.0747         | -0.0036 |
| ZnBr <sub>2</sub> ...C <sub>2</sub> H <sub>2</sub> -T | 0.0297 | 0.0754         | -0.0037 |
| ZnI <sub>2</sub> ...C <sub>2</sub> H <sub>2</sub> -T  | 0.0283 | 0.0711         | -0.0033 |
| CdCl <sub>2</sub> ...C <sub>2</sub> H <sub>2</sub> -T | 0.0245 | 0.0722         | -0.0006 |
| CdBr <sub>2</sub> ...C <sub>2</sub> H <sub>2</sub> -T | 0.0242 | 0.0708         | -0.0006 |
| CdI <sub>2</sub> ...C <sub>2</sub> H <sub>2</sub> -T  | 0.0226 | 0.0655         | -0.0003 |
| HgCl <sub>2</sub> ...C <sub>2</sub> H <sub>2</sub> -T | 0.0159 | 0.0473         | 0.0009  |
| HgBr <sub>2</sub> ...C <sub>2</sub> H <sub>2</sub> -T | 0.0157 | 0.0468         | 0.0009  |
| HgI <sub>2</sub> ...C <sub>2</sub> H <sub>2</sub> -T  | 0.0147 | 0.0438         | 0.0010  |
| ZnCl <sub>2</sub> ...C <sub>2</sub> H <sub>4</sub> -P | 0.0402 | 0.0857         | -0.0083 |
| ZnBr <sub>2</sub> ...C <sub>2</sub> H <sub>4</sub> -P | 0.0421 | 0.0893         | -0.0091 |
| ZnI <sub>2</sub> ...C <sub>2</sub> H <sub>4</sub> -P  | 0.0426 | 0.0898         | -0.0094 |
| CdCl <sub>2</sub> ...C <sub>2</sub> H <sub>4</sub> -P | /      | /              | /       |
| CdBr <sub>2</sub> ...C <sub>2</sub> H <sub>4</sub> -P | 0.0319 | 0.0817         | -0.0030 |
| CdI <sub>2</sub> ...C <sub>2</sub> H <sub>4</sub> -P  | 0.0311 | 0.0793         | -0.0028 |
| HgCl <sub>2</sub> ...C <sub>2</sub> H <sub>4</sub> -P | /      | /              | /       |
| HgBr <sub>2</sub> ...C <sub>2</sub> H <sub>4</sub> -P | 0.0175 | 0.0463         | 0.0005  |
| HgI <sub>2</sub> ...C <sub>2</sub> H <sub>4</sub> -P  | 0.0163 | 0.0434         | 0.0006  |
| ZnCl <sub>2</sub> ...C <sub>2</sub> H <sub>4</sub> -T | 0.0385 | 0.0832         | -0.0075 |
| ZnBr <sub>2</sub> ...C <sub>2</sub> H <sub>4</sub> -T | 0.0393 | 0.0843         | -0.0078 |
| ZnI <sub>2</sub> ...C <sub>2</sub> H <sub>4</sub> -T  | 0.0388 | 0.0821         | -0.0077 |

|                                                       |        |        |         |
|-------------------------------------------------------|--------|--------|---------|
| $\text{CdCl}_2 \cdots \text{C}_2\text{H}_4\text{-T}$  | 0.0316 | 0.0814 | -0.0028 |
| $\text{CdBr}_2 \cdots \text{C}_2\text{H}_4\text{-T}$  | 0.0315 | 0.0807 | -0.0028 |
| $\text{CdI}_2 \cdots \text{C}_2\text{H}_4\text{-T}$   | 0.0302 | 0.0770 | -0.0025 |
| $\text{HgCl}_2 \cdots \text{C}_2\text{H}_4\text{-T}$  | 0.0215 | 0.0561 | -0.0002 |
| $\text{HgBr}_2 \cdots \text{C}_2\text{H}_4\text{-T}$  | 0.0220 | 0.0570 | -0.0003 |
| $\text{HgI}_2 \cdots \text{C}_2\text{H}_4\text{-T}$   | 0.0211 | 0.0547 | -0.0001 |
| $\text{ZnCl}_2 \cdots \text{C}_2\text{F}_2\text{-P}$  | 0.0162 | 0.0426 | 0.0000  |
| $\text{ZnBr}_2 \cdots \text{C}_2\text{F}_2\text{-P}$  | 0.0158 | 0.0412 | 0.0001  |
| $\text{ZnI}_2 \cdots \text{C}_2\text{F}_2\text{-P}$   | 0.0140 | 0.0363 | 0.0003  |
| $\text{CdCl}_2 \cdots \text{C}_2\text{F}_2\text{-P}$  | 0.0173 | 0.0506 | 0.0005  |
| $\text{CdBr}_2 \cdots \text{C}_2\text{F}_2\text{-P}$  | 0.0168 | 0.0486 | 0.0005  |
| $\text{CdI}_2 \cdots \text{C}_2\text{F}_2\text{-P}$   | 0.0154 | 0.0440 | 0.0006  |
| $\text{HgCl}_2 \cdots \text{C}_2\text{F}_2\text{-P}$  | 0.0143 | 0.0430 | 0.0010  |
| $\text{HgBr}_2 \cdots \text{C}_2\text{F}_2\text{-P}$  | 0.0140 | 0.0423 | 0.0010  |
| $\text{HgI}_2 \cdots \text{C}_2\text{F}_2\text{-P}$   | 0.0138 | 0.0413 | 0.0010  |
| $\text{ZnCl}_2 \cdots \text{C}_2\text{Li}_2\text{-P}$ | 0.0882 | 0.2278 | -0.0312 |
| $\text{ZnBr}_2 \cdots \text{C}_2\text{Li}_2\text{-P}$ | 0.0878 | 0.2251 | -0.0309 |
| $\text{ZnI}_2 \cdots \text{C}_2\text{Li}_2\text{-P}$  | 0.0867 | 0.2204 | -0.0303 |
| $\text{CdCl}_2 \cdots \text{C}_2\text{Li}_2\text{-P}$ | 0.0746 | 0.2134 | -0.0192 |
| $\text{CdBr}_2 \cdots \text{C}_2\text{Li}_2\text{-P}$ | 0.0738 | 0.2095 | -0.0189 |
| $\text{CdI}_2 \cdots \text{C}_2\text{Li}_2\text{-P}$  | 0.0729 | 0.2050 | -0.0185 |
| $\text{HgCl}_2 \cdots \text{C}_2\text{Li}_2\text{-P}$ | 0.0883 | 0.2272 | -0.0261 |
| $\text{HgBr}_2 \cdots \text{C}_2\text{Li}_2\text{-P}$ | 0.0869 | 0.2212 | -0.0255 |
| $\text{HgI}_2 \cdots \text{C}_2\text{Li}_2\text{-P}$  | 0.0849 | 0.2132 | -0.0245 |

---

**Table S4.** Electrostatic energy (ES), exchange energy (EX), repulsion energy (REP), polarization energy (POL), and dispersion energy (DISP) in the selected complexes at the MP2/aug-cc-pVTZ level. All are in kcal/mol.

|                                                       | ES     | EX     | REP    | POL    | DISP  |
|-------------------------------------------------------|--------|--------|--------|--------|-------|
| ZnCl <sub>2</sub> ···C <sub>2</sub> H <sub>2</sub> -P | -29.51 | -45.06 | 83.67  | -16.43 | -4.99 |
| ZnBr <sub>2</sub> ···C <sub>2</sub> H <sub>2</sub> -P | -31.95 | -51.86 | 96.03  | -18.31 | -5.66 |
| ZnI <sub>2</sub> ···C <sub>2</sub> H <sub>2</sub> -P  | -33.54 | -58.16 | 106.98 | -20.00 | -6.13 |
| CdCl <sub>2</sub> ···C <sub>2</sub> H <sub>2</sub> -P | -22.82 | -34.95 | 63.84  | -11.36 | -5.33 |
| CdBr <sub>2</sub> ···C <sub>2</sub> H <sub>2</sub> -P | -23.41 | -38.14 | 69.28  | -11.88 | -5.65 |
| CdI <sub>2</sub> ···C <sub>2</sub> H <sub>2</sub> -P  | -23.12 | -40.43 | 72.75  | -12.03 | -5.80 |
| HgCl <sub>2</sub> ···C <sub>2</sub> H <sub>2</sub> -P | -10.79 | -18.85 | 32.79  | -3.95  | -4.35 |
| HgBr <sub>2</sub> ···C <sub>2</sub> H <sub>2</sub> -P | -10.75 | -20.25 | 35.06  | -3.99  | -4.70 |
| HgI <sub>2</sub> ···C <sub>2</sub> H <sub>2</sub> -P  | -9.88  | -20.48 | 35.07  | -3.72  | -4.97 |
| ZnCl <sub>2</sub> ···C <sub>2</sub> H <sub>2</sub> -T | -16.81 | -30.52 | 55.49  | -10.42 | -5.00 |
| ZnBr <sub>2</sub> ···C <sub>2</sub> H <sub>2</sub> -T | -18.09 | -34.58 | 62.46  | -11.21 | -5.46 |
| ZnI <sub>2</sub> ···C <sub>2</sub> H <sub>2</sub> -T  | -18.26 | -37.43 | 66.72  | -11.32 | -5.73 |
| CdCl <sub>2</sub> ···C <sub>2</sub> H <sub>2</sub> -T | -13.59 | -25.14 | 45.28  | -8.09  | -5.36 |
| CdBr <sub>2</sub> ···C <sub>2</sub> H <sub>2</sub> -T | -14.02 | -27.28 | 48.73  | -8.27  | -5.60 |
| CdI <sub>2</sub> ···C <sub>2</sub> H <sub>2</sub> -T  | -13.76 | -28.69 | 50.53  | -8.00  | -5.70 |
| HgCl <sub>2</sub> ···C <sub>2</sub> H <sub>2</sub> -T | -6.91  | -15.60 | 26.93  | -3.27  | -4.78 |
| HgBr <sub>2</sub> ···C <sub>2</sub> H <sub>2</sub> -T | -7.14  | -17.03 | 29.18  | -3.34  | -5.11 |
| HgI <sub>2</sub> ···C <sub>2</sub> H <sub>2</sub> -T  | -7.14  | -17.03 | 29.18  | -3.34  | -5.11 |
| ZnCl <sub>2</sub> ···C <sub>2</sub> H <sub>4</sub> -P | -30.23 | -49.51 | 92.10  | -18.56 | -6.91 |
| ZnBr <sub>2</sub> ···C <sub>2</sub> H <sub>4</sub> -P | -33.38 | -57.61 | 106.78 | -20.80 | -7.76 |
| ZnI <sub>2</sub> ···C <sub>2</sub> H <sub>4</sub> -P  | -35.71 | -65.34 | 120.17 | -22.91 | -8.38 |
| CdCl <sub>2</sub> ···C <sub>2</sub> H <sub>4</sub> -P | /      | /      | /      | /      | /     |
| CdBr <sub>2</sub> ···C <sub>2</sub> H <sub>4</sub> -P | -24.55 | -43.50 | 79.30  | -14.31 | -7.45 |
| CdI <sub>2</sub> ···C <sub>2</sub> H <sub>4</sub> -P  | -25.25 | -47.68 | 86.04  | -14.91 | -7.73 |
| HgCl <sub>2</sub> ···C <sub>2</sub> H <sub>4</sub> -P | /      | /      | /      | /      | /     |
| HgBr <sub>2</sub> ···C <sub>2</sub> H <sub>4</sub> -P | -11.32 | -24.16 | 41.93  | -4.88  | -6.11 |
| HgI <sub>2</sub> ···C <sub>2</sub> H <sub>4</sub> -P  | -11.06 | -25.67 | 44.00  | -4.81  | -6.52 |
| ZnCl <sub>2</sub> ···C <sub>2</sub> H <sub>4</sub> -T | -27.21 | -44.05 | 82.25  | -16.39 | -6.56 |
| ZnBr <sub>2</sub> ···C <sub>2</sub> H <sub>4</sub> -T | -29.13 | -49.86 | 92.49  | -17.69 | -7.18 |



|                                                        |         |         |        |         |        |
|--------------------------------------------------------|---------|---------|--------|---------|--------|
| ZnI <sub>2</sub> ···C <sub>2</sub> H <sub>4</sub> -T   | -30.19  | -55.15  | 101.17 | -18.76  | -7.57  |
| CdCl <sub>2</sub> ···C <sub>2</sub> H <sub>4</sub> -T  | -22.12  | -36.78  | 67.86  | -12.68  | -6.95  |
| CdBr <sub>2</sub> ···C <sub>2</sub> H <sub>4</sub> -T  | -22.86  | -40.02  | 73.28  | -13.14  | -7.27  |
| CdI <sub>2</sub> ···C <sub>2</sub> H <sub>4</sub> -T   | -23.00  | -43.02  | 77.81  | -13.28  | -7.45  |
| HgCl <sub>2</sub> ···C <sub>2</sub> H <sub>4</sub> -T  | -12.84  | -25.36  | 44.94  | -6.00   | -6.24  |
| HgBr <sub>2</sub> ···C <sub>2</sub> H <sub>4</sub> -T  | -13.64  | -28.38  | 50.07  | -6.44   | -6.75  |
| HgI <sub>2</sub> ···C <sub>2</sub> H <sub>4</sub> -T   | -13.47  | -30.12  | 52.52  | -6.40   | -7.14  |
| ZnCl <sub>2</sub> ···C <sub>2</sub> F <sub>2</sub> -P  | -6.91   | -16.31  | 29.05  | -4.12   | -5.24  |
| ZnBr <sub>2</sub> ···C <sub>2</sub> F <sub>2</sub> -P  | -7.24   | -18.32  | 32.41  | -4.09   | -5.88  |
| ZnI <sub>2</sub> ···C <sub>2</sub> F <sub>2</sub> -P   | -6.94   | -19.01  | 33.17  | -3.60   | -6.30  |
| CdCl <sub>2</sub> ···C <sub>2</sub> F <sub>2</sub> -P  | -6.60   | -16.13  | 28.85  | -4.32   | -5.88  |
| CdBr <sub>2</sub> ···C <sub>2</sub> F <sub>2</sub> -P  | -6.89   | -17.67  | 31.40  | -4.21   | -6.34  |
| CdI <sub>2</sub> ···C <sub>2</sub> F <sub>2</sub> -P   | -6.94   | -18.76  | 32.97  | -3.85   | -6.71  |
| HgCl <sub>2</sub> ···C <sub>2</sub> F <sub>2</sub> -P  | -3.99   | -11.54  | 20.02  | -2.08   | -5.44  |
| HgBr <sub>2</sub> ···C <sub>2</sub> F <sub>2</sub> -P  | -4.47   | -13.30  | 23.02  | -2.17   | -6.04  |
| HgI <sub>2</sub> ···C <sub>2</sub> F <sub>2</sub> -P   | -4.82   | -14.77  | 25.39  | -2.11   | -6.58  |
| ZnCl <sub>2</sub> ···C <sub>2</sub> Li <sub>2</sub> -P | -176.29 | -169.28 | 331.47 | -83.85  | -10.44 |
| ZnBr <sub>2</sub> ···C <sub>2</sub> Li <sub>2</sub> -P | -171.59 | -175.81 | 340.82 | -86.87  | -10.41 |
| ZnI <sub>2</sub> ···C <sub>2</sub> Li <sub>2</sub> -P  | -161.80 | -182.77 | 347.82 | -91.36  | -9.94  |
| CdCl <sub>2</sub> ···C <sub>2</sub> Li <sub>2</sub> -P | -164.34 | -163.47 | 319.89 | -80.70  | -11.66 |
| CdBr <sub>2</sub> ···C <sub>2</sub> Li <sub>2</sub> -P | -157.82 | -166.35 | 322.57 | -81.82  | -11.45 |
| CdI <sub>2</sub> ···C <sub>2</sub> Li <sub>2</sub> -P  | -148.17 | -169.49 | 323.53 | -83.97  | -10.81 |
| HgCl <sub>2</sub> ···C <sub>2</sub> Li <sub>2</sub> -P | -177.93 | -210.50 | 411.49 | -119.31 | -11.32 |
| HgBr <sub>2</sub> ···C <sub>2</sub> Li <sub>2</sub> -P | -169.45 | -211.53 | 410.98 | -118.60 | -10.72 |
| HgI <sub>2</sub> ···C <sub>2</sub> Li <sub>2</sub> -P  | -156.48 | -211.24 | 405.84 | -117.79 | -9.73  |

---

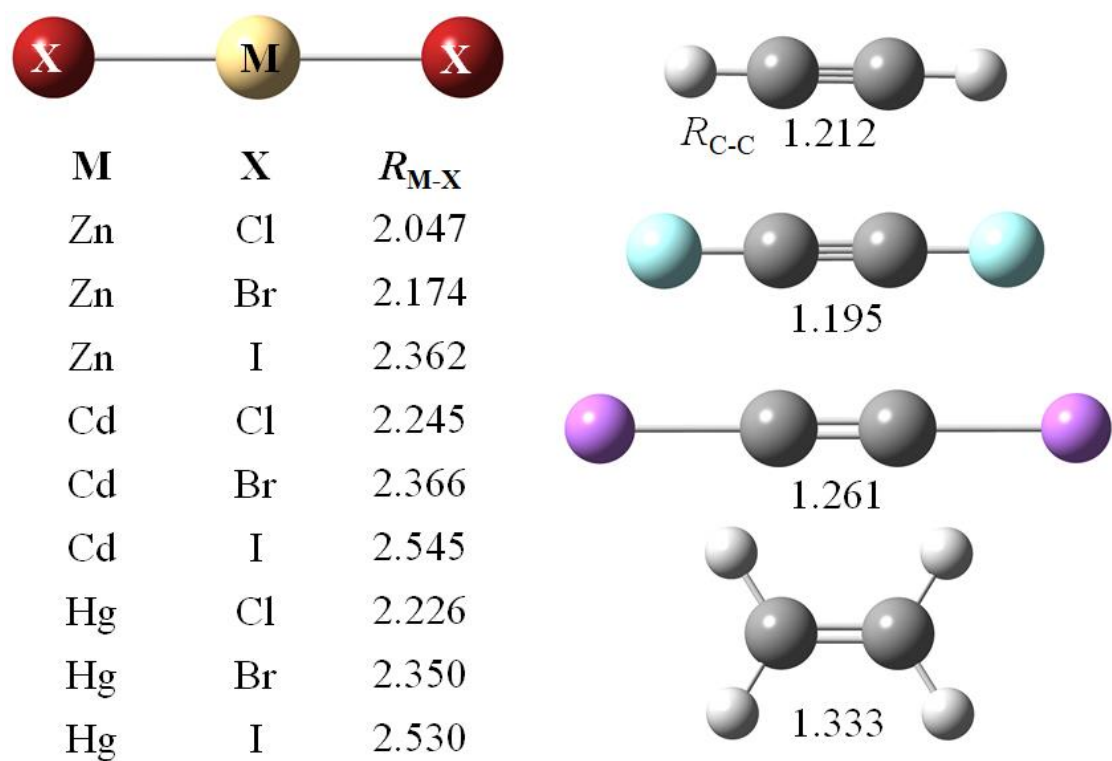

**Figure S1.** The optimized geometries of the  $MX_2$  ( $M=Zn, Cd, Hg$ ;  $X = Cl, Br, I$ ),  $C_2H_2$ ,  $C_2F_2$ ,  $C_2Li_2$  and  $C_2H_4$  molecules at the MP2/aug-cc-pVTZ level.

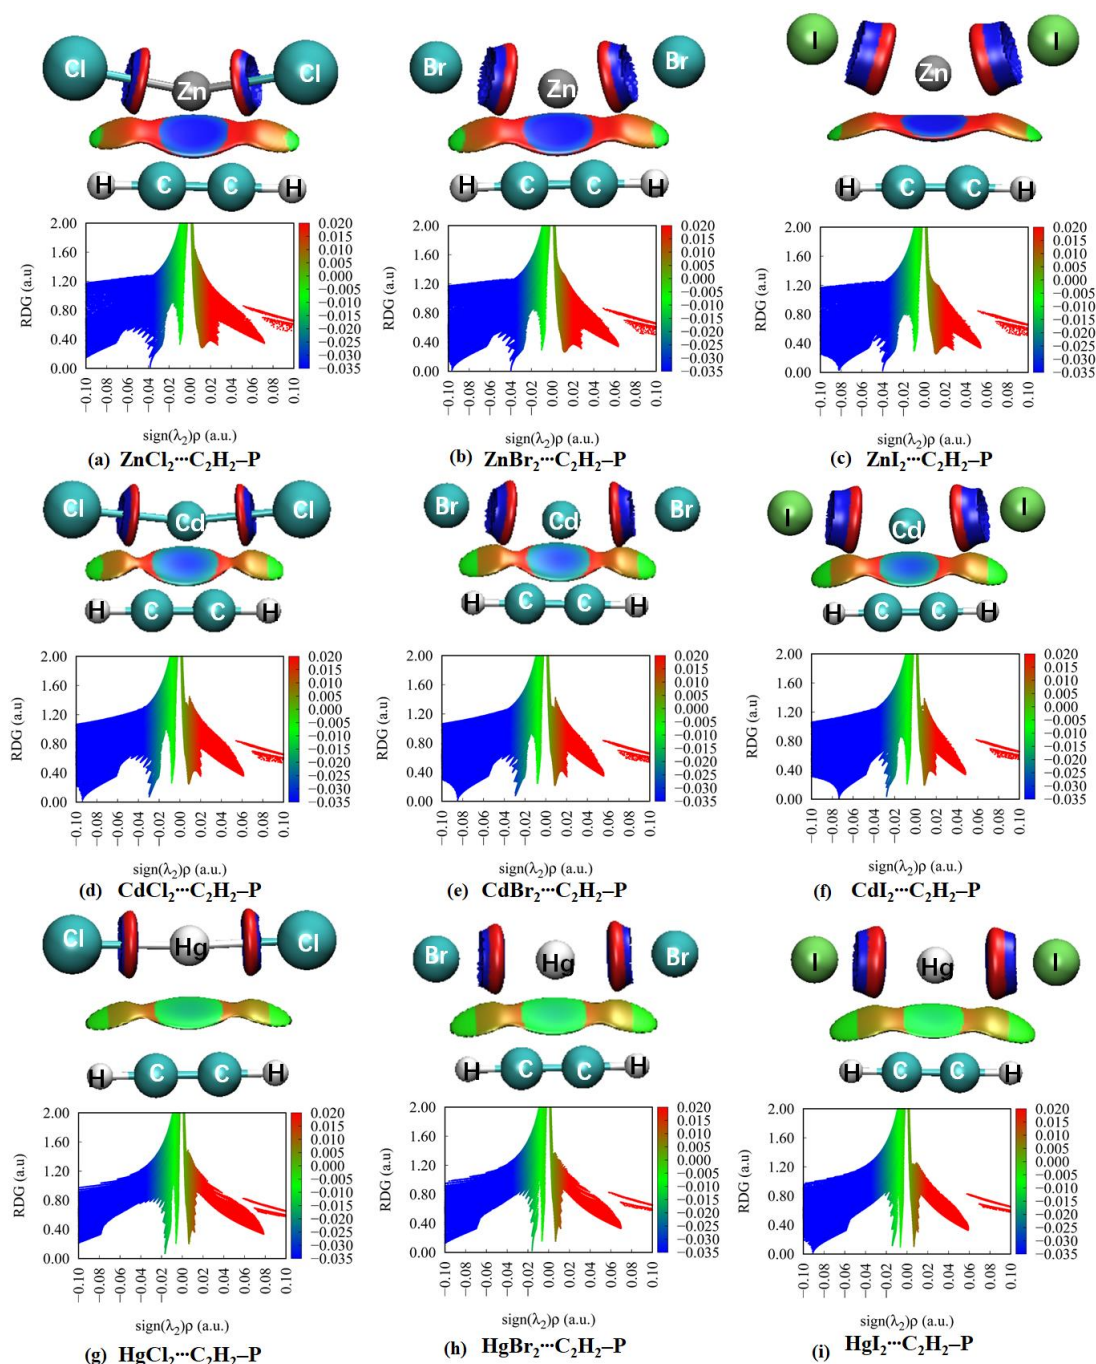

**Figure S2.** Plots of the reduced density gradient RDG *versus* the electron density multiplied by the sign of the second Hessian eigenvalue ( $\text{sign}(\lambda_2)\rho$ ) of  $\text{MX}_2 \cdots \text{C}_2\text{H}_2\text{-P}$ . NCI maps of the corresponding binary complexes. Blue, green, orange, and red areas correspond to strong attractive, weak attractive, weak repulsive, and strong repulsive interactions, respectively.

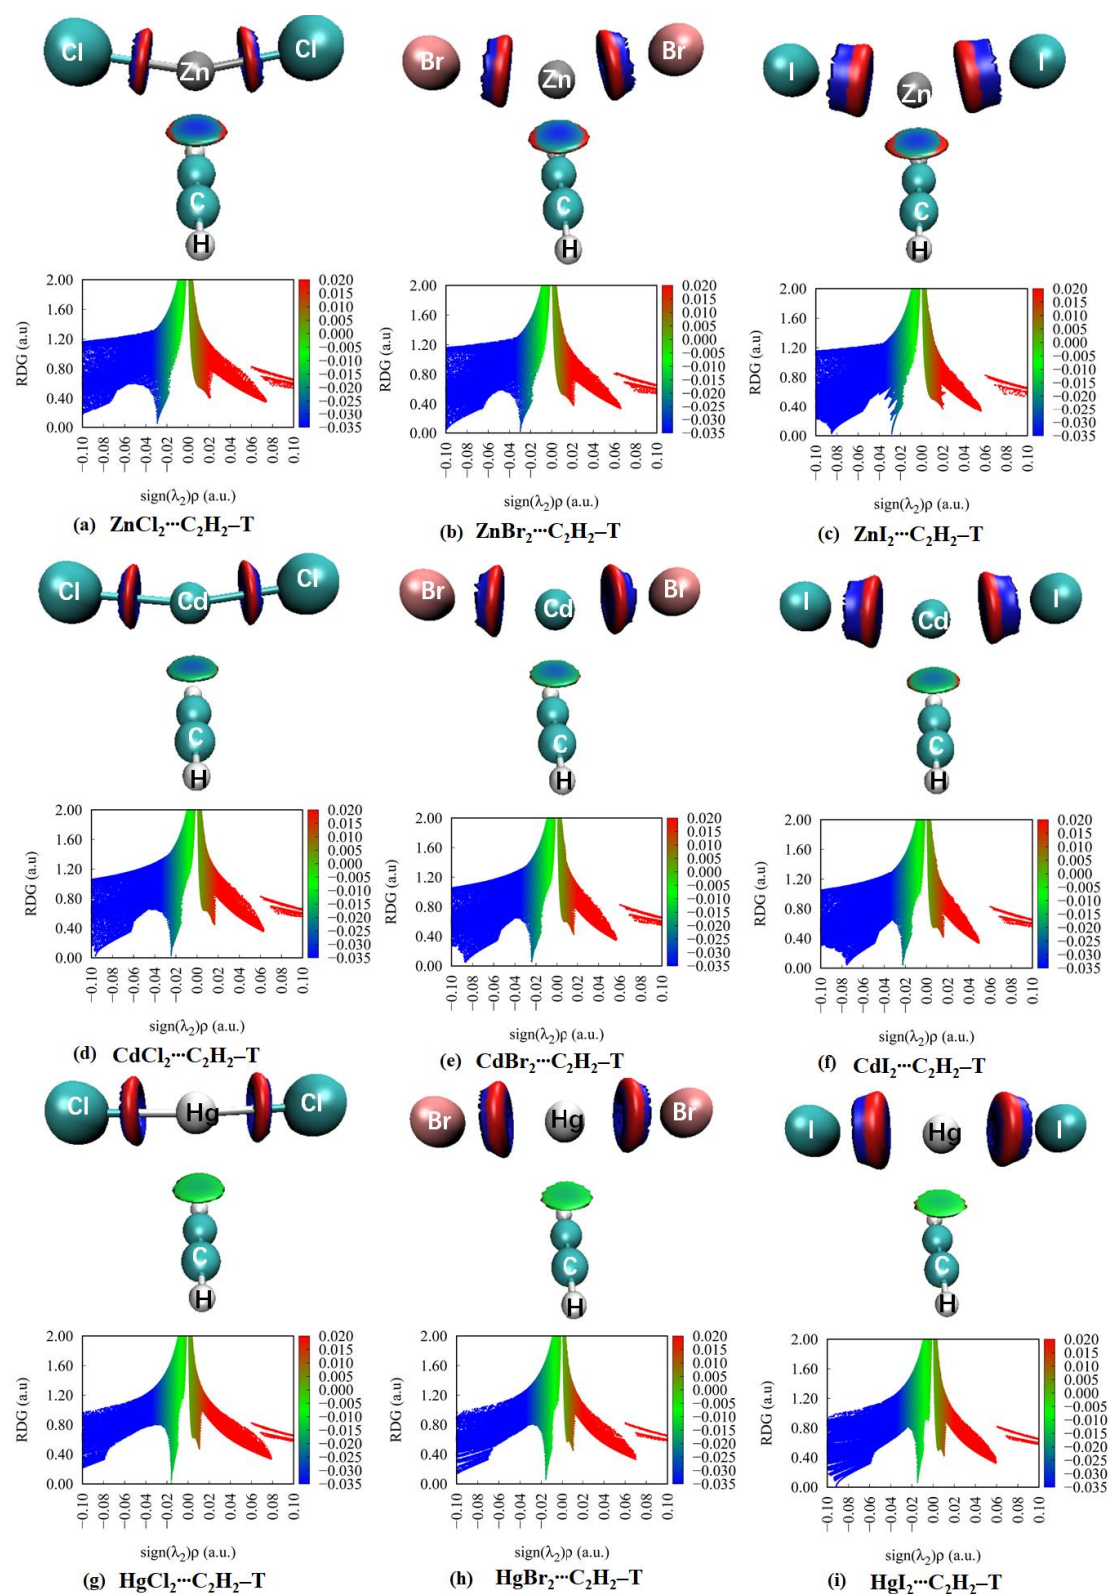

**Figure S3.** Plots of the reduced density gradient  $\text{RDG}$  versus the electron density multiplied by the sign of the second Hessian eigenvalue ( $\text{sign}(\lambda_2)\rho$ ) of  $\text{MX}_2 \cdots \text{C}_2\text{H}_2\text{-T}$ . NCI maps of the corresponding binary complexes. Blue, green, orange, and red areas correspond to strong attractive, weak attractive, weak repulsive, and strong repulsive interactions, respectively.

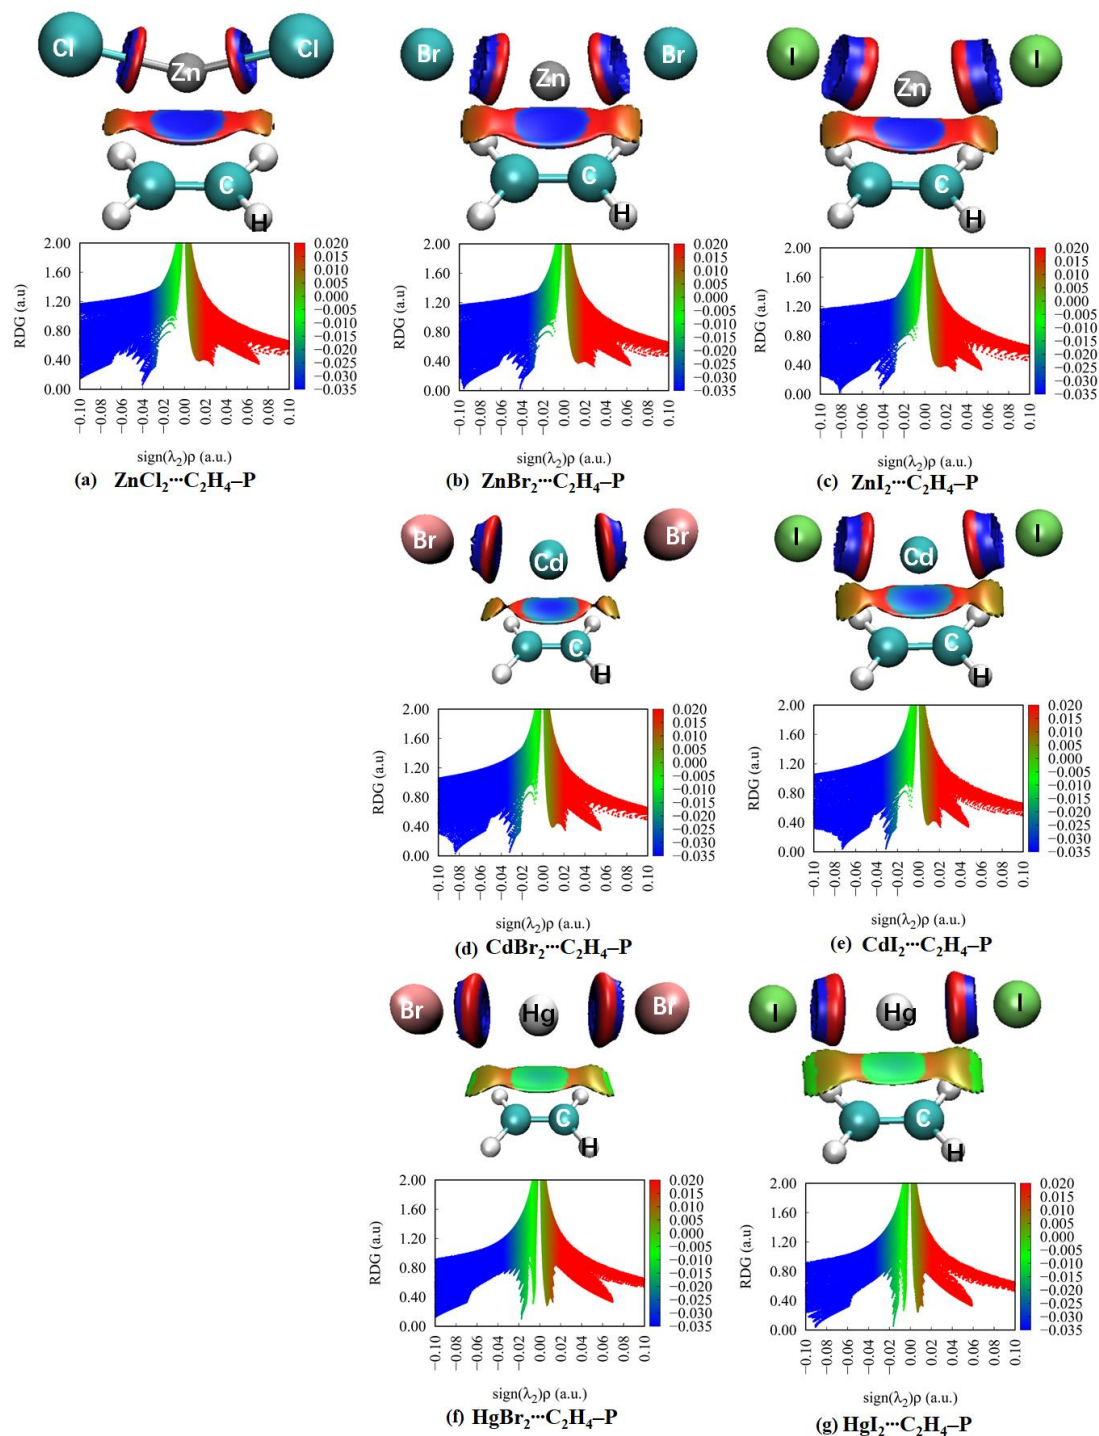

**Figure S4.** Plots of the reduced density gradient RDG *versus* the electron density multiplied by the sign of the second Hessian eigenvalue ( $\text{sign}(\lambda_2)\rho$ ) of  $\text{MX}_2 \cdots \text{C}_2\text{H}_4\text{-P}$ . NCI maps of the corresponding binary complexes. Blue, green, orange, and red areas correspond to strong attractive, weak attractive, weak repulsive, and strong repulsive interactions, respectively.



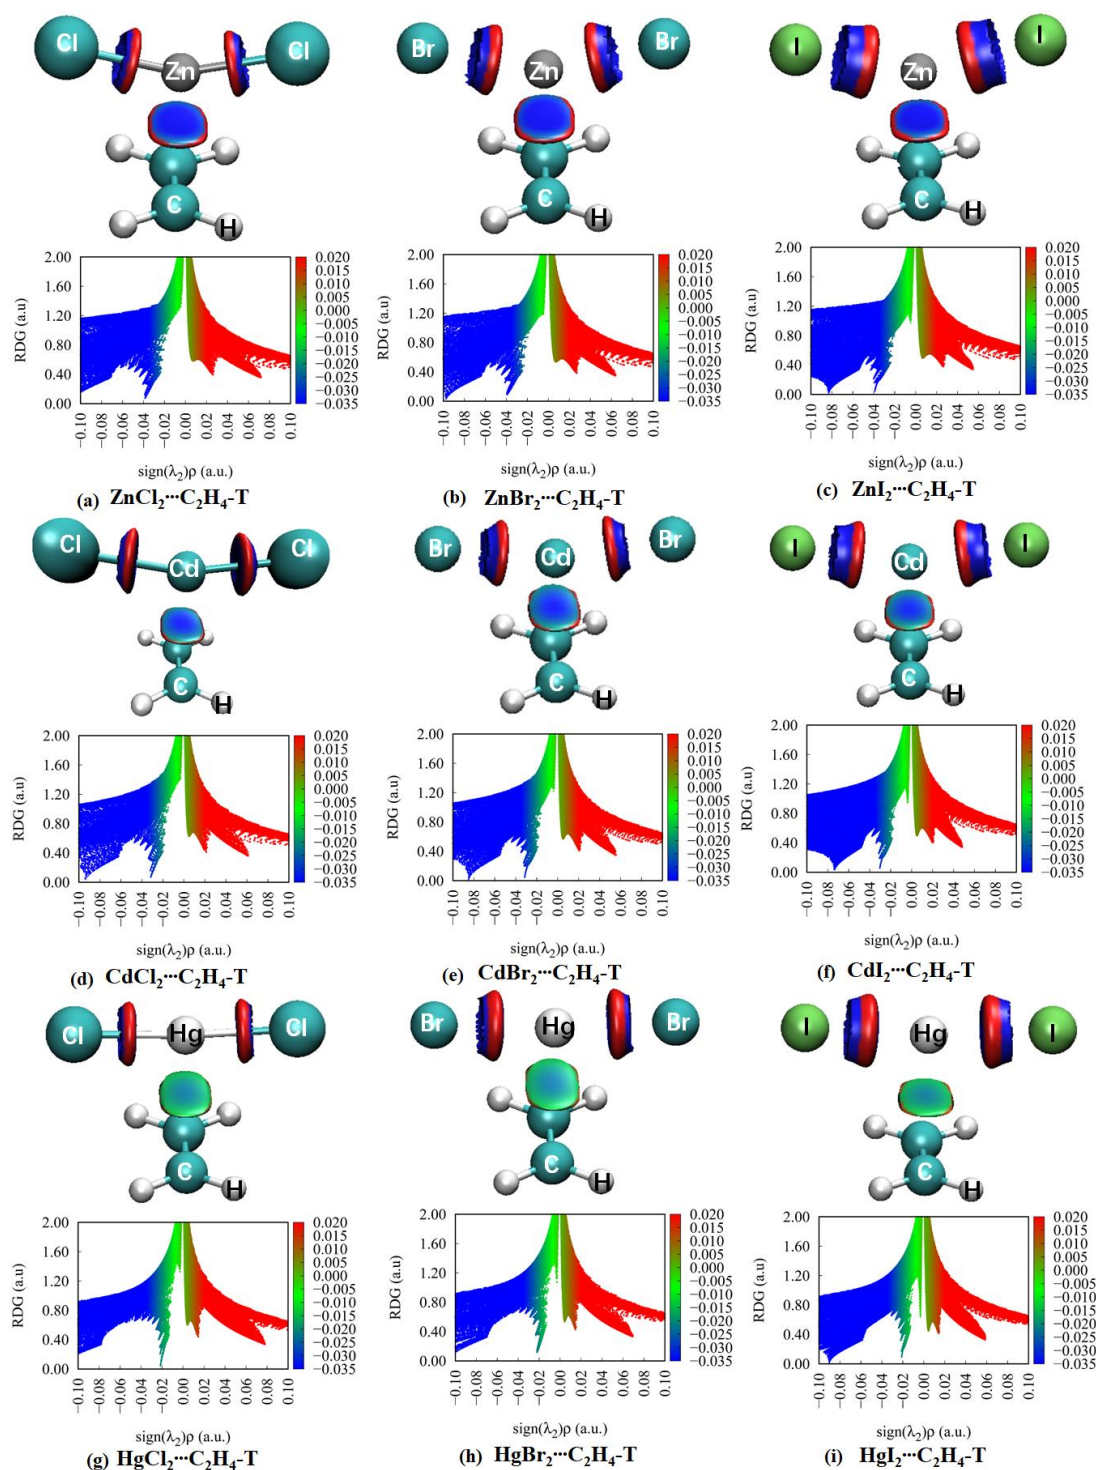

**Figure S5.** Plots of the reduced density gradient RDG *versus* the electron density multiplied by the sign of the second Hessian eigenvalue ( $\text{sign}(\lambda_2)\rho$ ) of  $\text{MX}_2 \cdots \text{C}_2\text{H}_4\text{-T}$ . NCI maps of the corresponding binary complexes. Blue, green, orange, and red areas correspond to strong attractive, weak attractive, weak repulsive, and strong repulsive interactions, respectively.

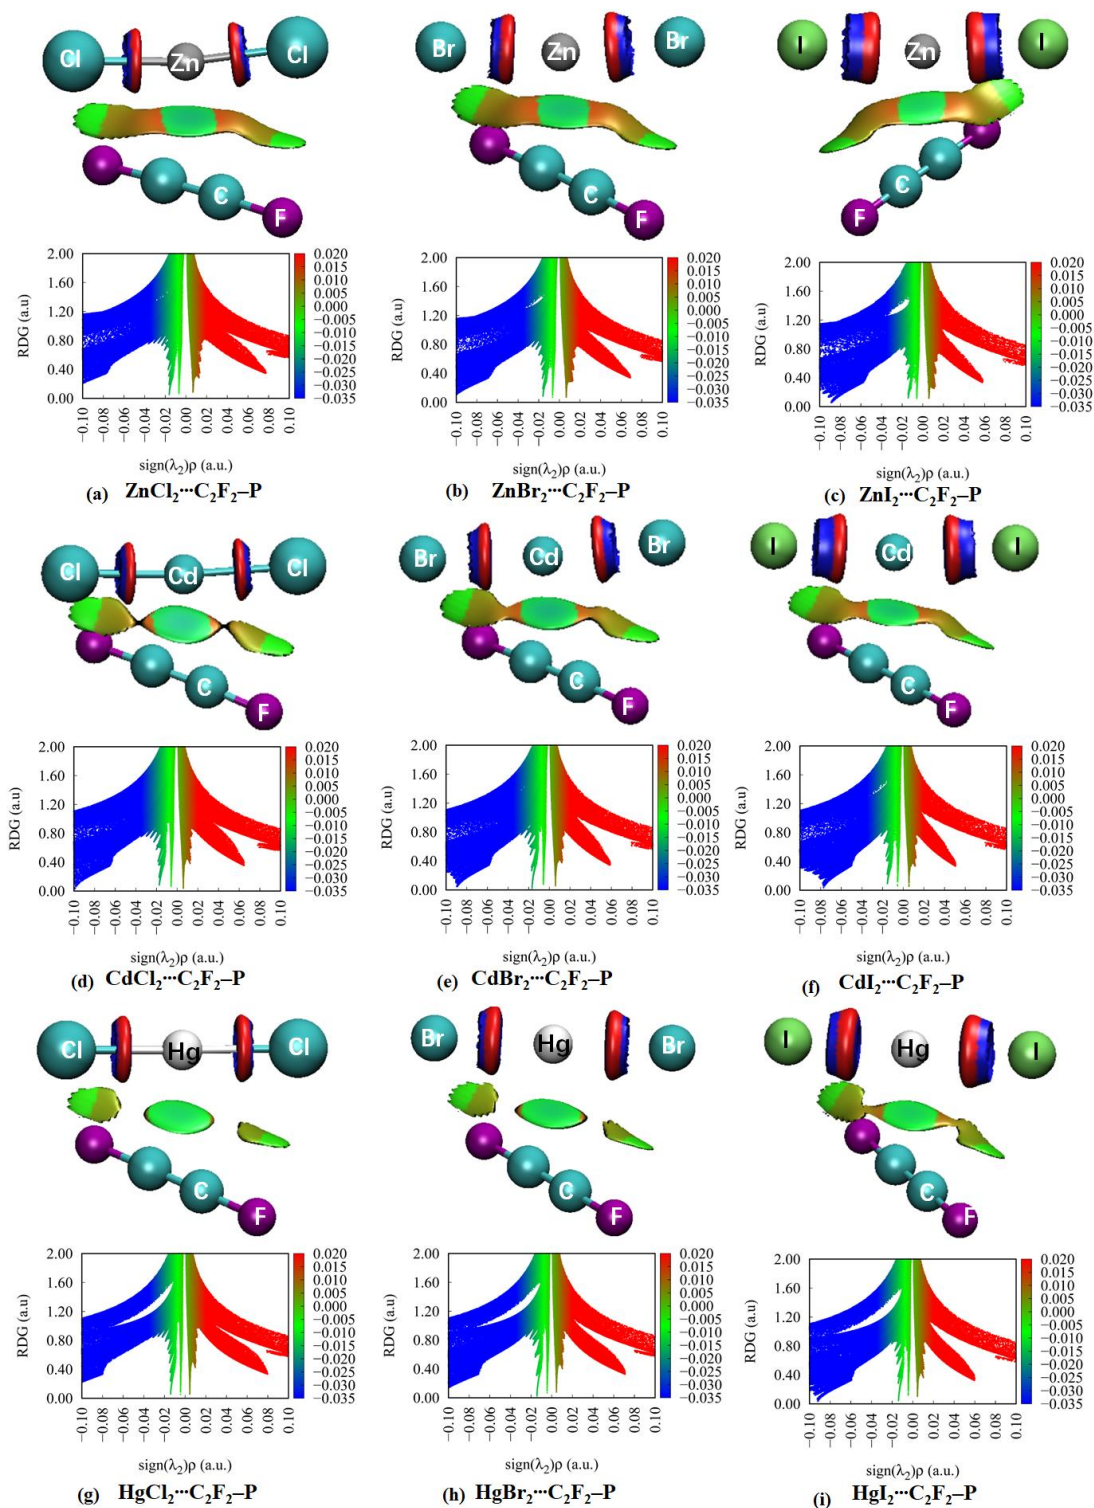

**Figure S6.** Plots of the reduced density gradient RDG *versus* the electron density multiplied by the sign of the second Hessian eigenvalue ( $\text{sign}(\lambda_2)\rho$ ) of  $\text{MX}_2 \cdots \text{C}_2\text{F}_2\text{-P}$ . NCI maps of the corresponding binary complexes. Blue, green, orange, and red areas correspond to strong attractive, weak attractive, weak repulsive, and strong repulsive interactions, respectively.



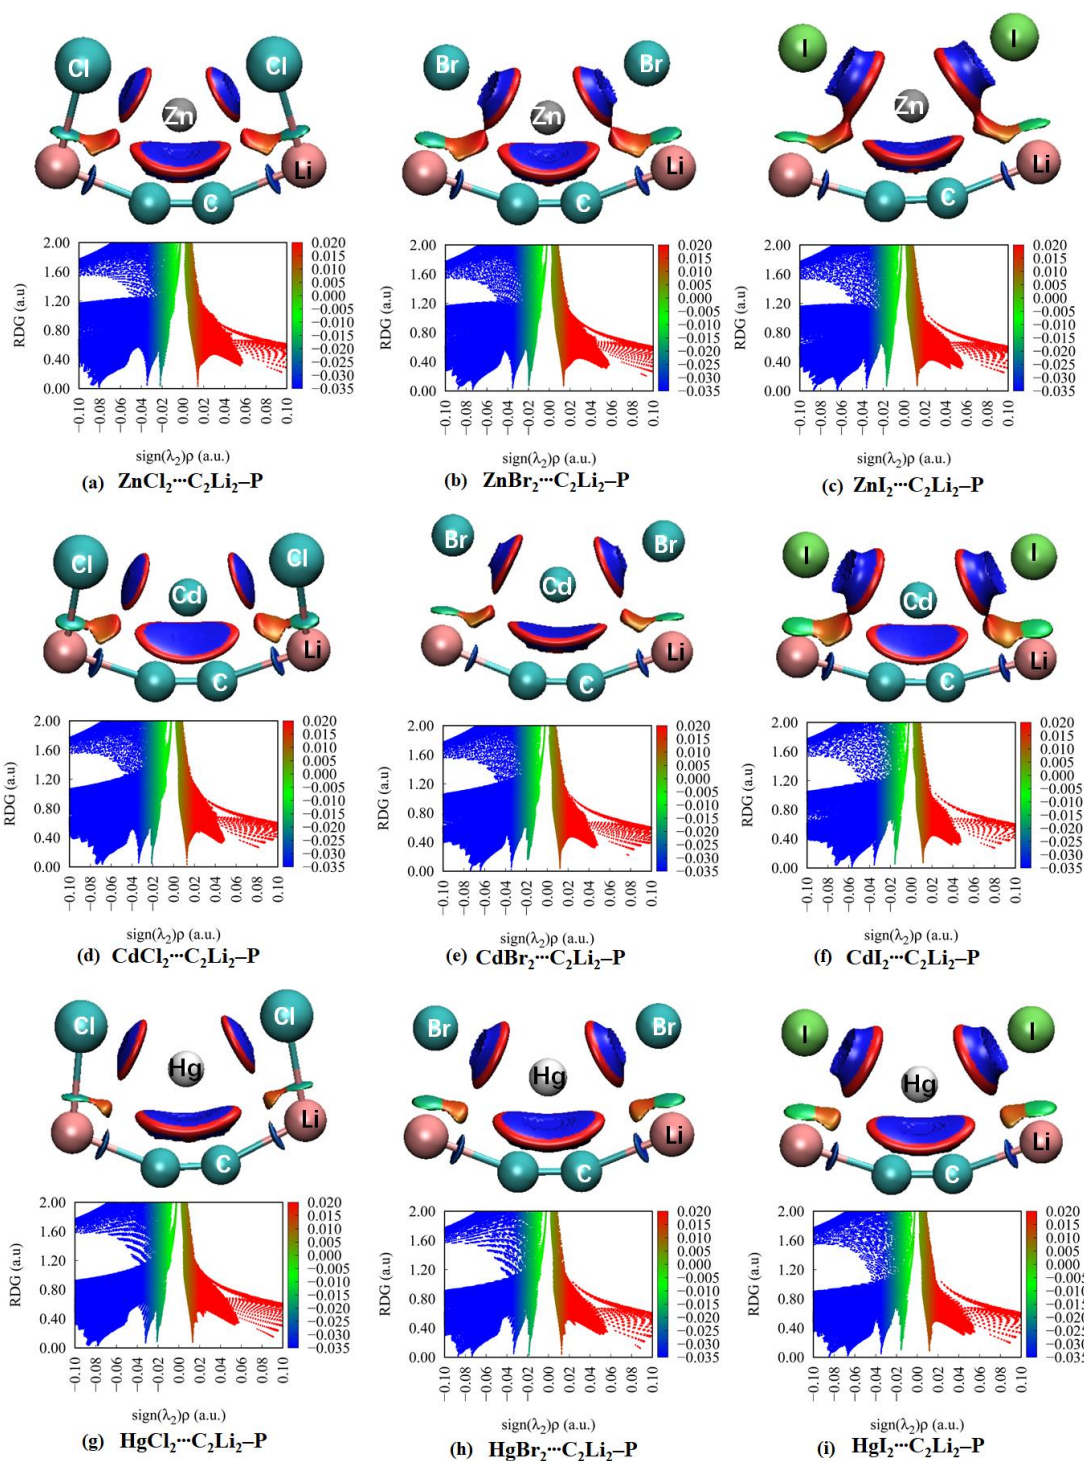

**Figure S7.** Plots of the reduced density gradient RDG *versus* the electron density multiplied by the sign of the second Hessian eigenvalue ( $\text{sign}(\lambda_2)\rho$ ) of  $\text{MX}_2 \cdots \text{C}_2\text{Li}_2\text{-P}$ . NCI maps of the corresponding binary complexes. Blue, green, orange, and red areas correspond to strong attractive, weak attractive, weak repulsive, and strong repulsive interactions, respectively.



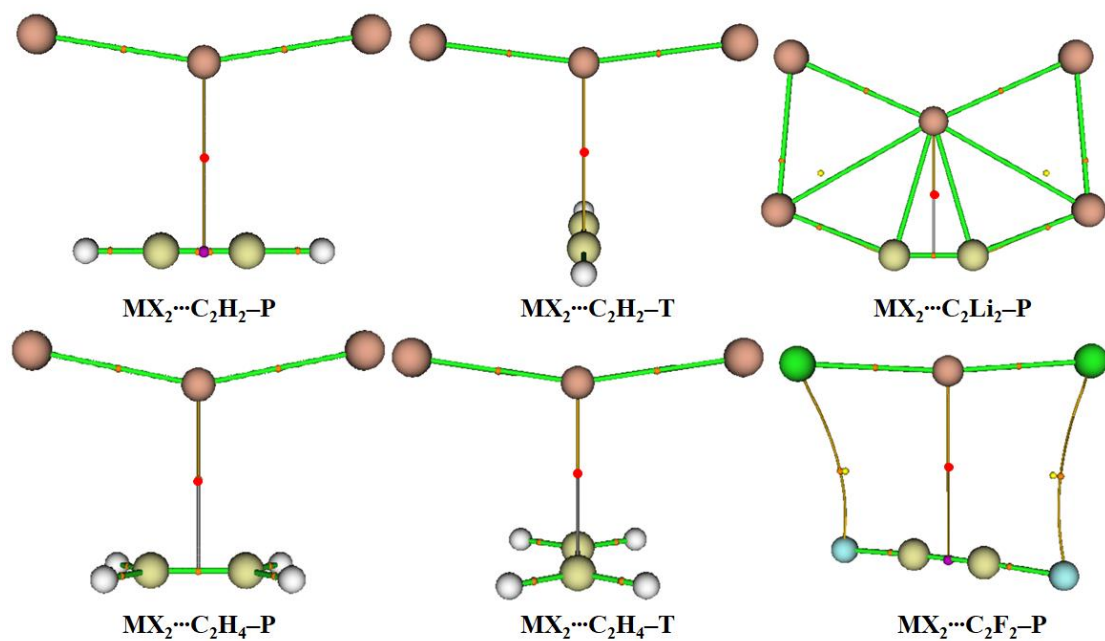

**Figure S8.** Molecular graphs of sodium- $\pi$  bonded stable complexes at the intermolecular bond critical points.

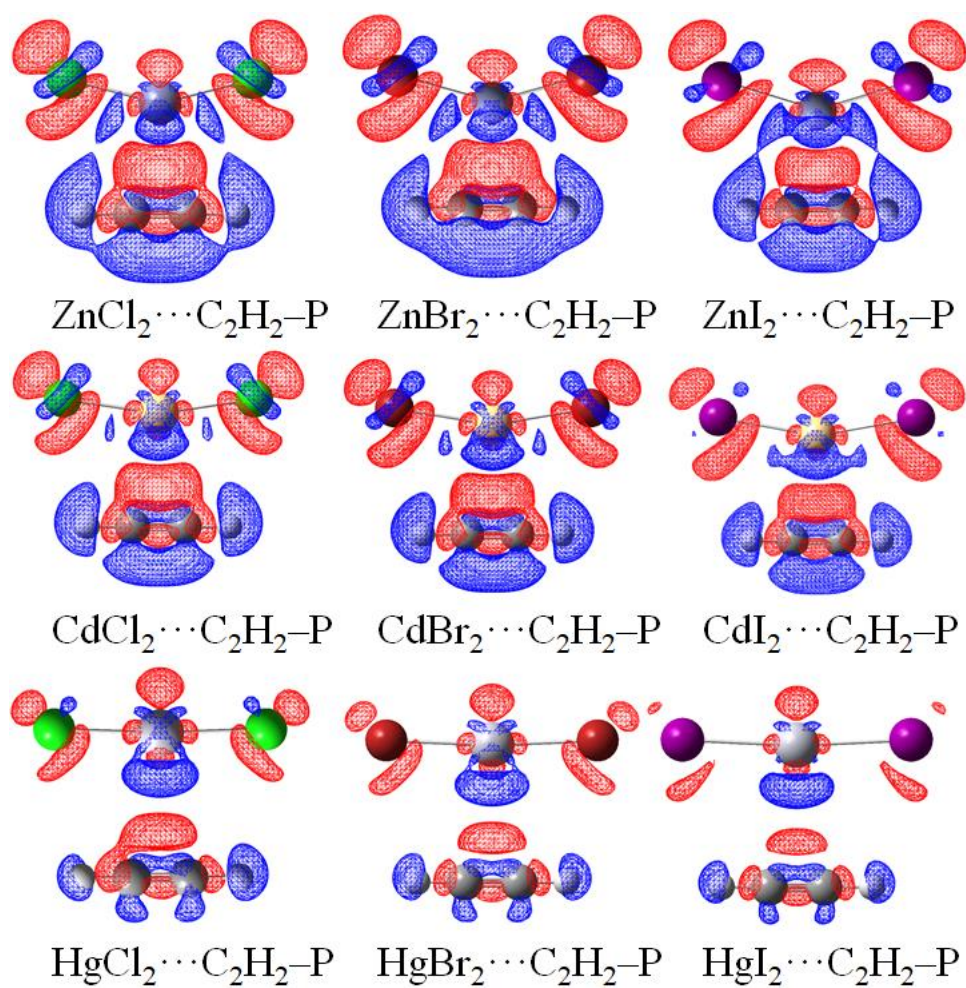

**Figure S9.** Electron density shifts of the  $\text{MX}_2 \cdots \text{C}_2\text{H}_2\text{-P}$  complexes (iso =  $\pm 0.0008$ ). Red regions indicate increased electron density, while blue regions represent decreased electron density.

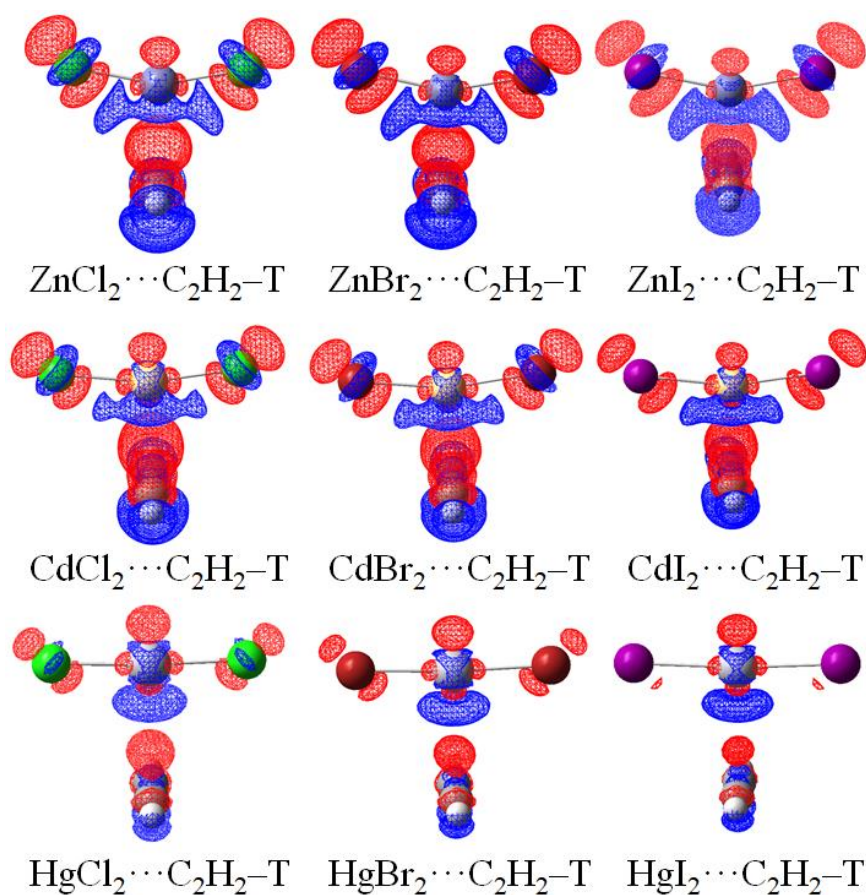

**Figure S10.** Electron density shifts of the  $\text{MX}_2 \cdots \text{C}_2\text{H}_2\text{-T}$  complexes (iso =  $\pm 0.0008$ ). Red regions indicate increased electron density, while blue regions represent decreased electron density.

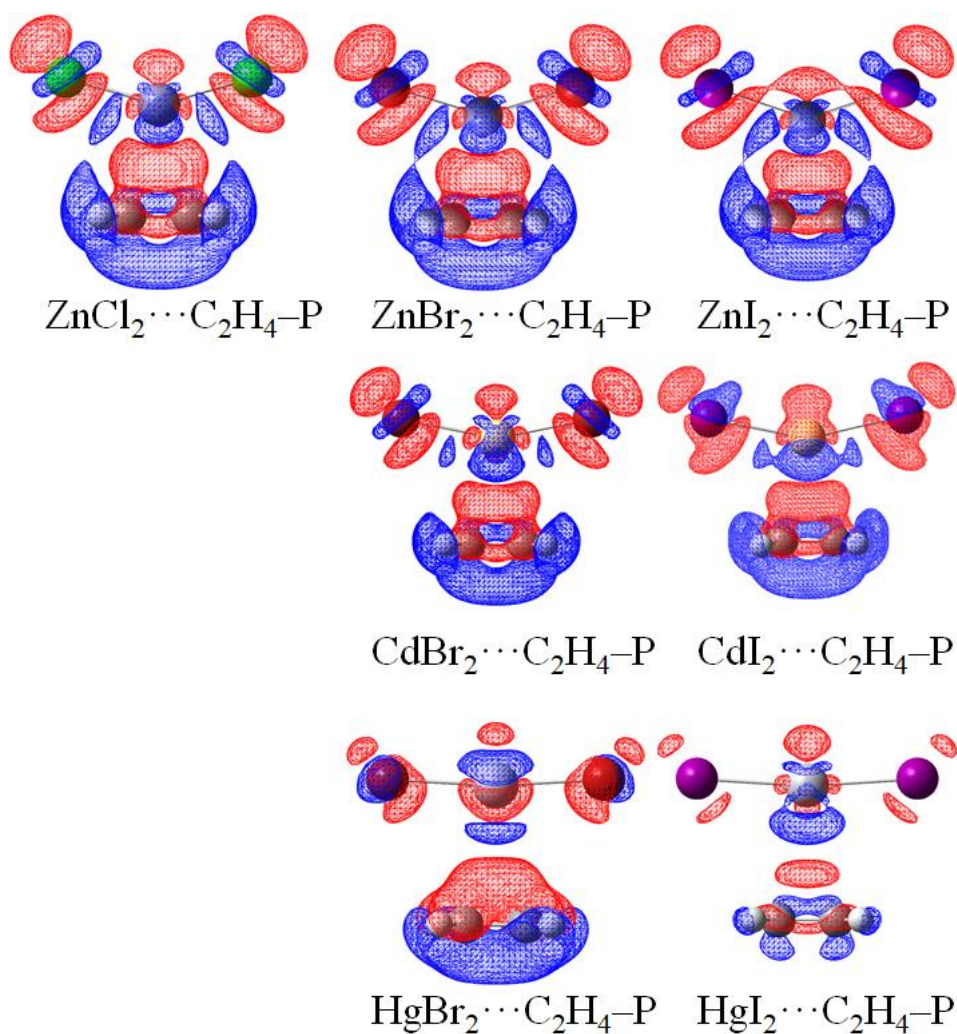

**Figure S11.** Electron density shifts of the  $\text{MX}_2 \cdots \text{C}_2\text{H}_4\text{-P}$  complexes (iso =  $\pm 0.0008$ ). Red regions indicate increased electron density, while blue regions represent decreased electron density.



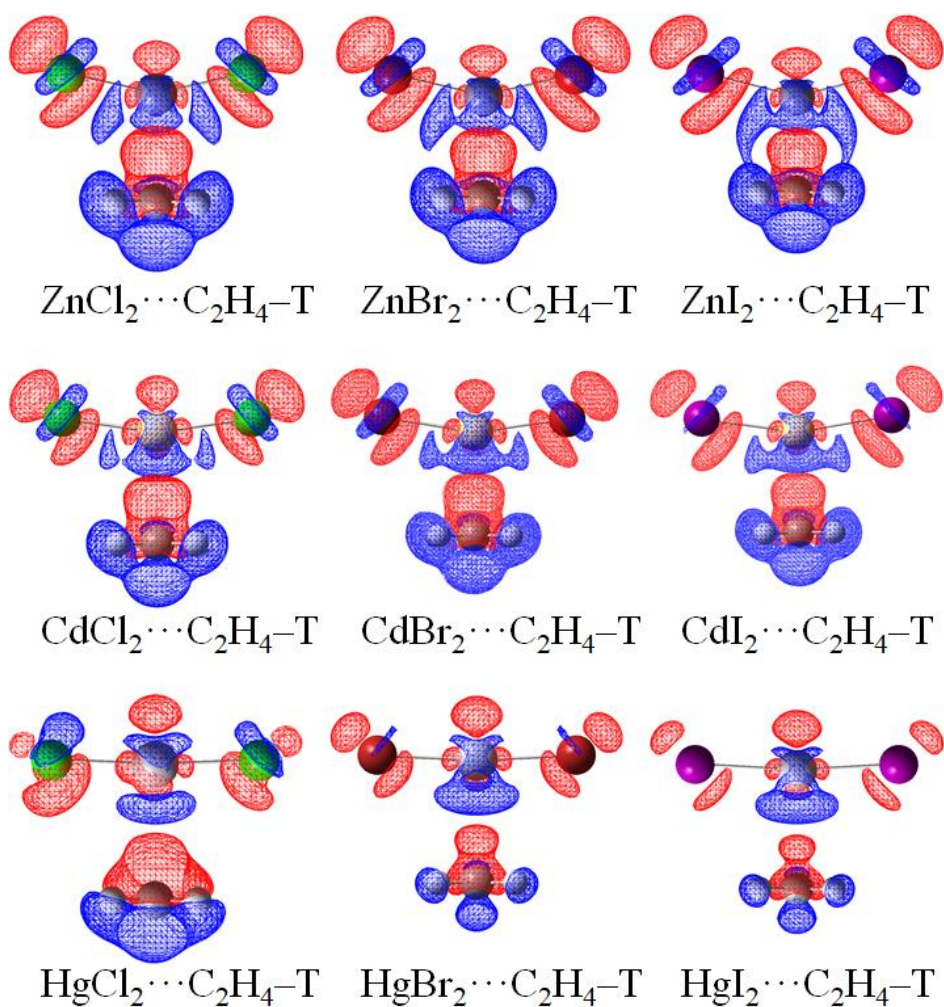

**Figure S12.** Electron density shifts of the  $\text{MX}_2 \cdots \text{C}_2\text{H}_4\text{-T}$  complexes (iso =  $\pm 0.0008$ ). Red regions indicate increased electron density, while blue regions represent decreased electron density.

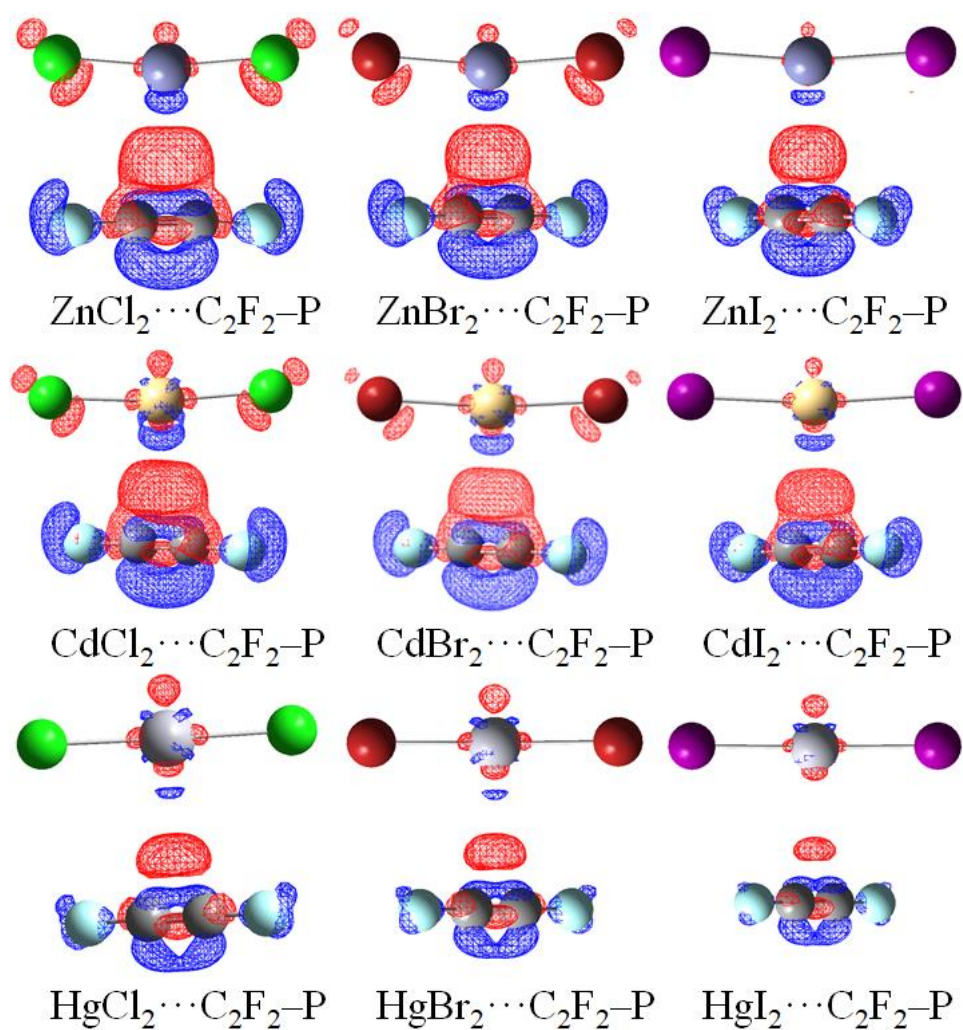

**Figure S13.** Electron density shifts of the  $\text{MX}_2 \cdots \text{C}_2\text{F}_2\text{-P}$  complexes (iso =  $\pm 0.0008$ ). Red regions indicate increased electron density, while blue regions represent decreased electron density.

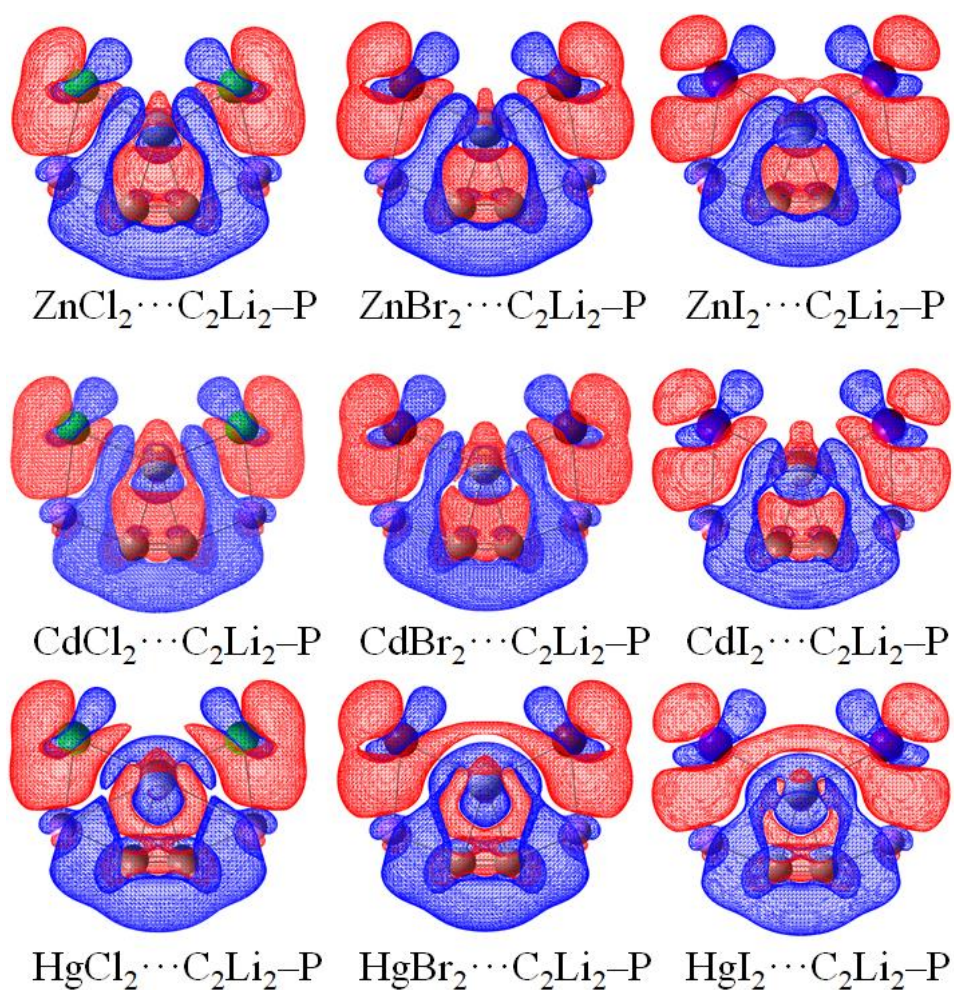

**Figure S14.** Electron density shifts of the  $\text{MX}_2 \cdots \text{C}_2\text{Li}_2\text{-P}$  complexes (iso =  $\pm 0.0008$ ). Red regions indicate increased electron density, while blue regions represent decreased electron density.

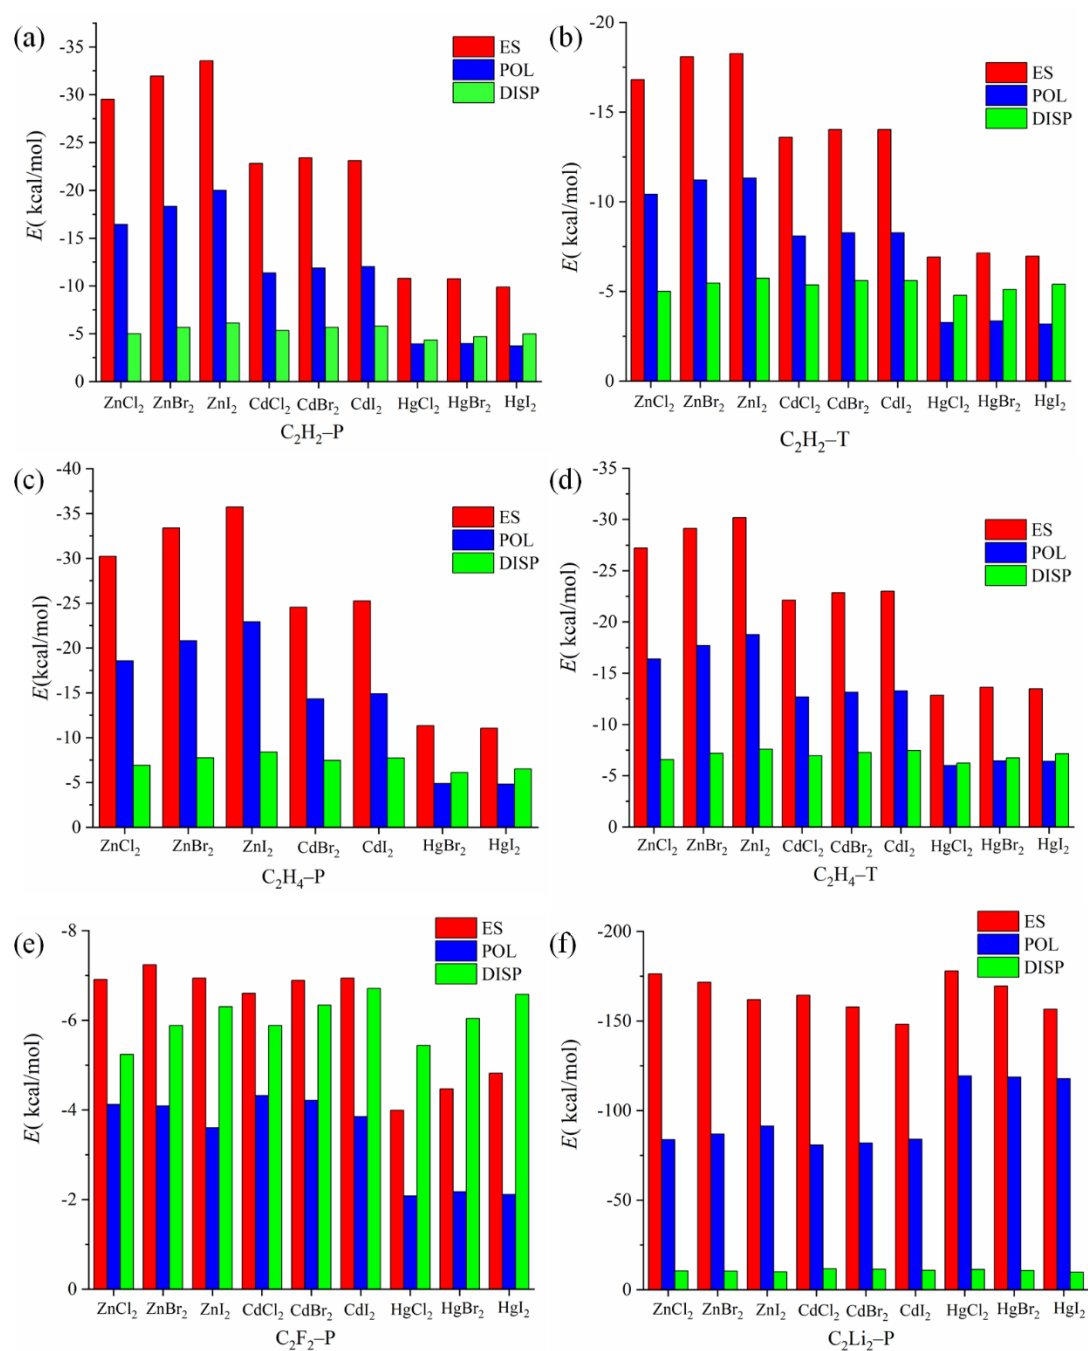

**Figure S15.** Comparison of electrostatic (ES), polarization (POL), and dispersion (DISP) energies in the binary complexes.
